# Supplementary material for: Incorporating topological information for predicting robust cancer subnetwork markers in human protein-protein interaction network
Source: PubMed Central journal article supplement (PMC5073942; doi:10.1186/s12859-016-1224-1), 2016-10-06

# Supplementary Materials for “Incorporating topological information for predicting robust cancer subnetwork markers in human protein-protein interaction network”

Navadon Khunlertgit<sup>1</sup> and Byung-Jun Yoon<sup>1,2,\*</sup>

<sup>1</sup> Department of Electrical and Computer Engineering, Texas A&M University, College Station, TX 77843-3128, USA

<sup>2</sup> College of Science and Engineering, Hamad bin Khalifa University (HBKU), P.O. Box 5825, Doha, Qatar

\* Correspondence: Byung-Jun Yoon (bjyoon@ece.tamu.edu)

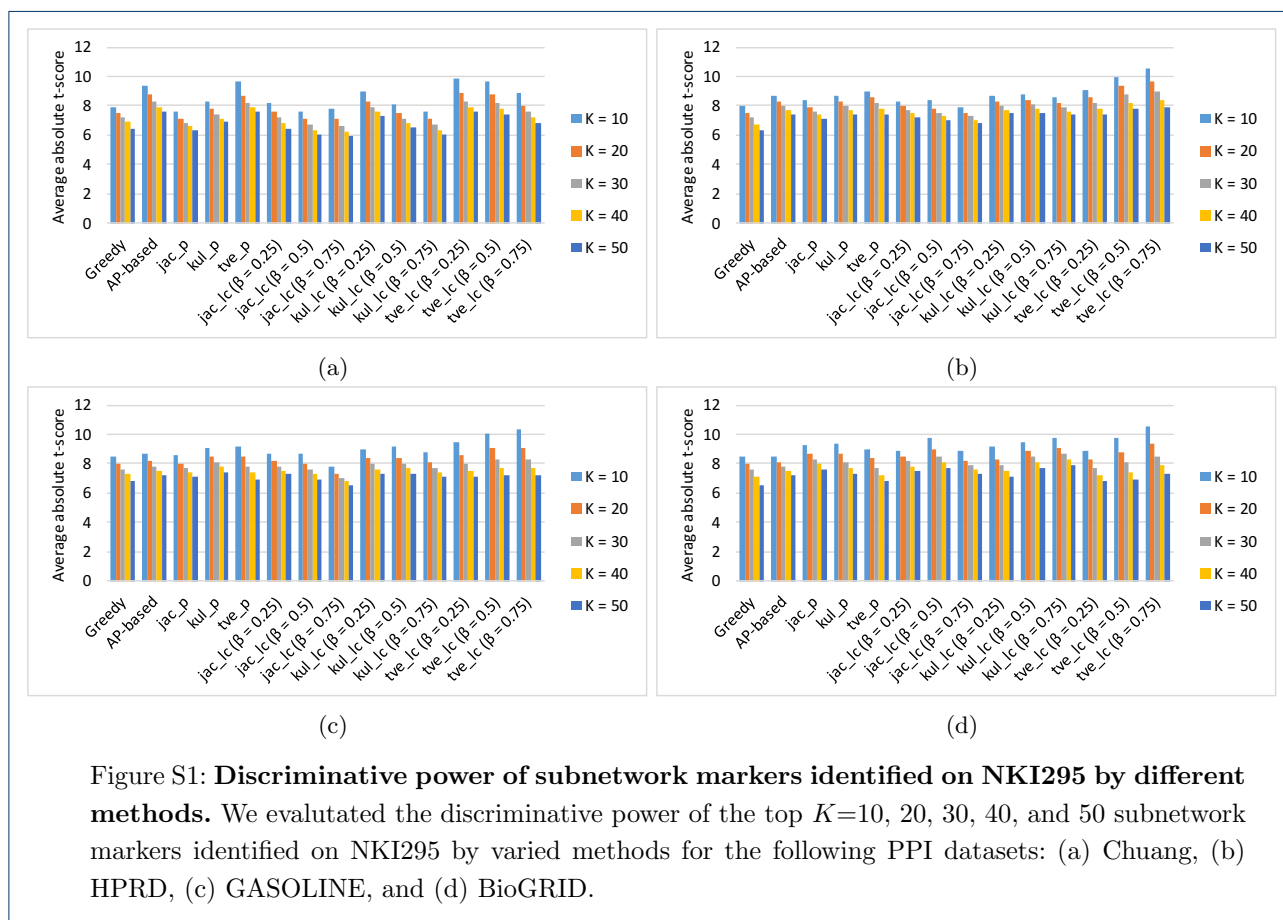

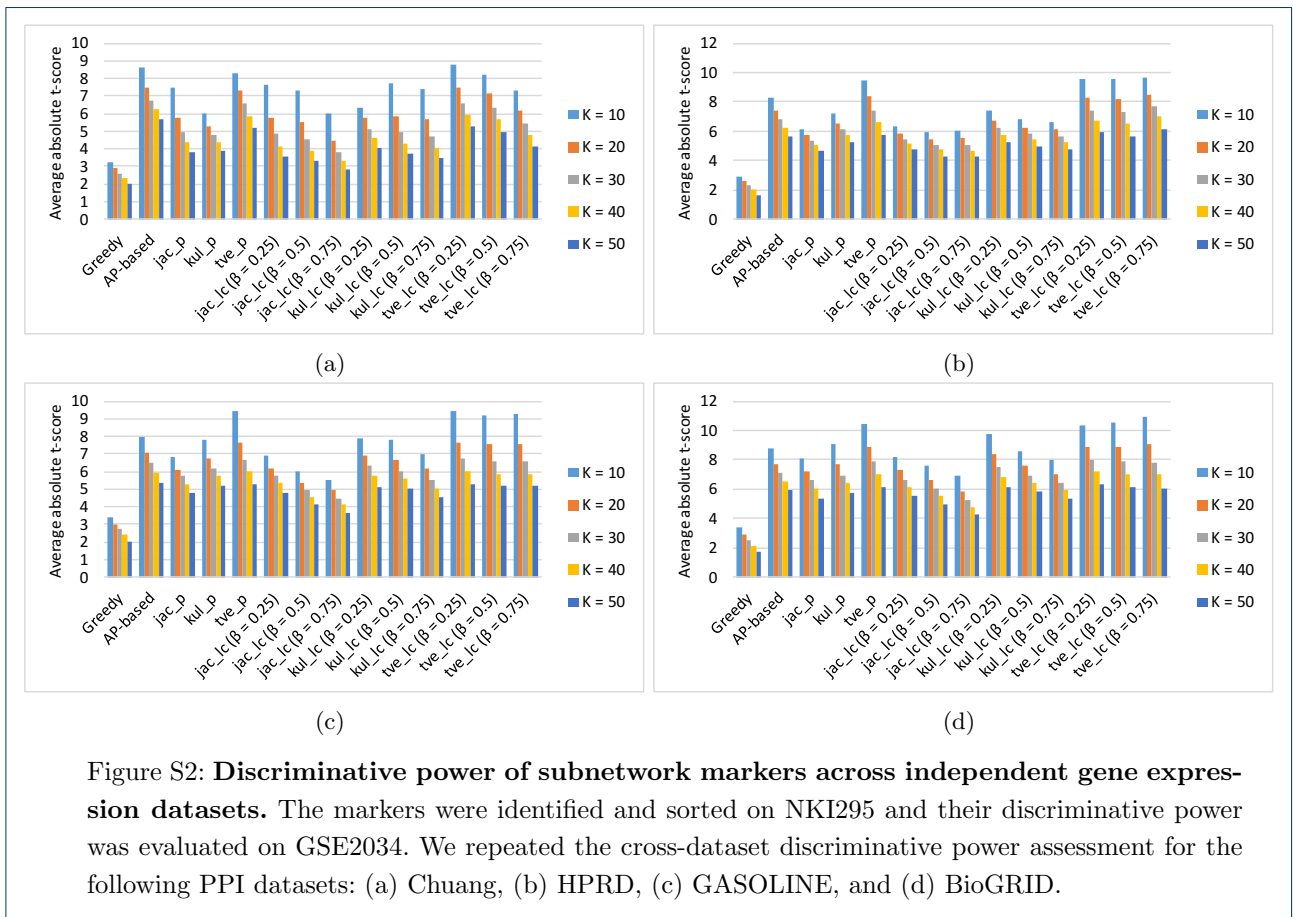

Supplement: 12859_2016_1224_MOESM1_ESM.pdf [file 12859_2016_1224_MOESM1_ESM.pdf]
